# Supplementary figures and images for: Polyphyly in 16S rRNA-based LVTree Versus Monophyly in Whole-genome-based CVTree
Source: PubMed Central journal article supplement — Genomics Proteomics Bioinformatics. 2018 Dec 11;16(5):310–9. doi: 10.1016/j.gpb.2018.06.005 (PMC6364046; doi:10.1016/j.gpb.2018.06.005), 2018-12-11

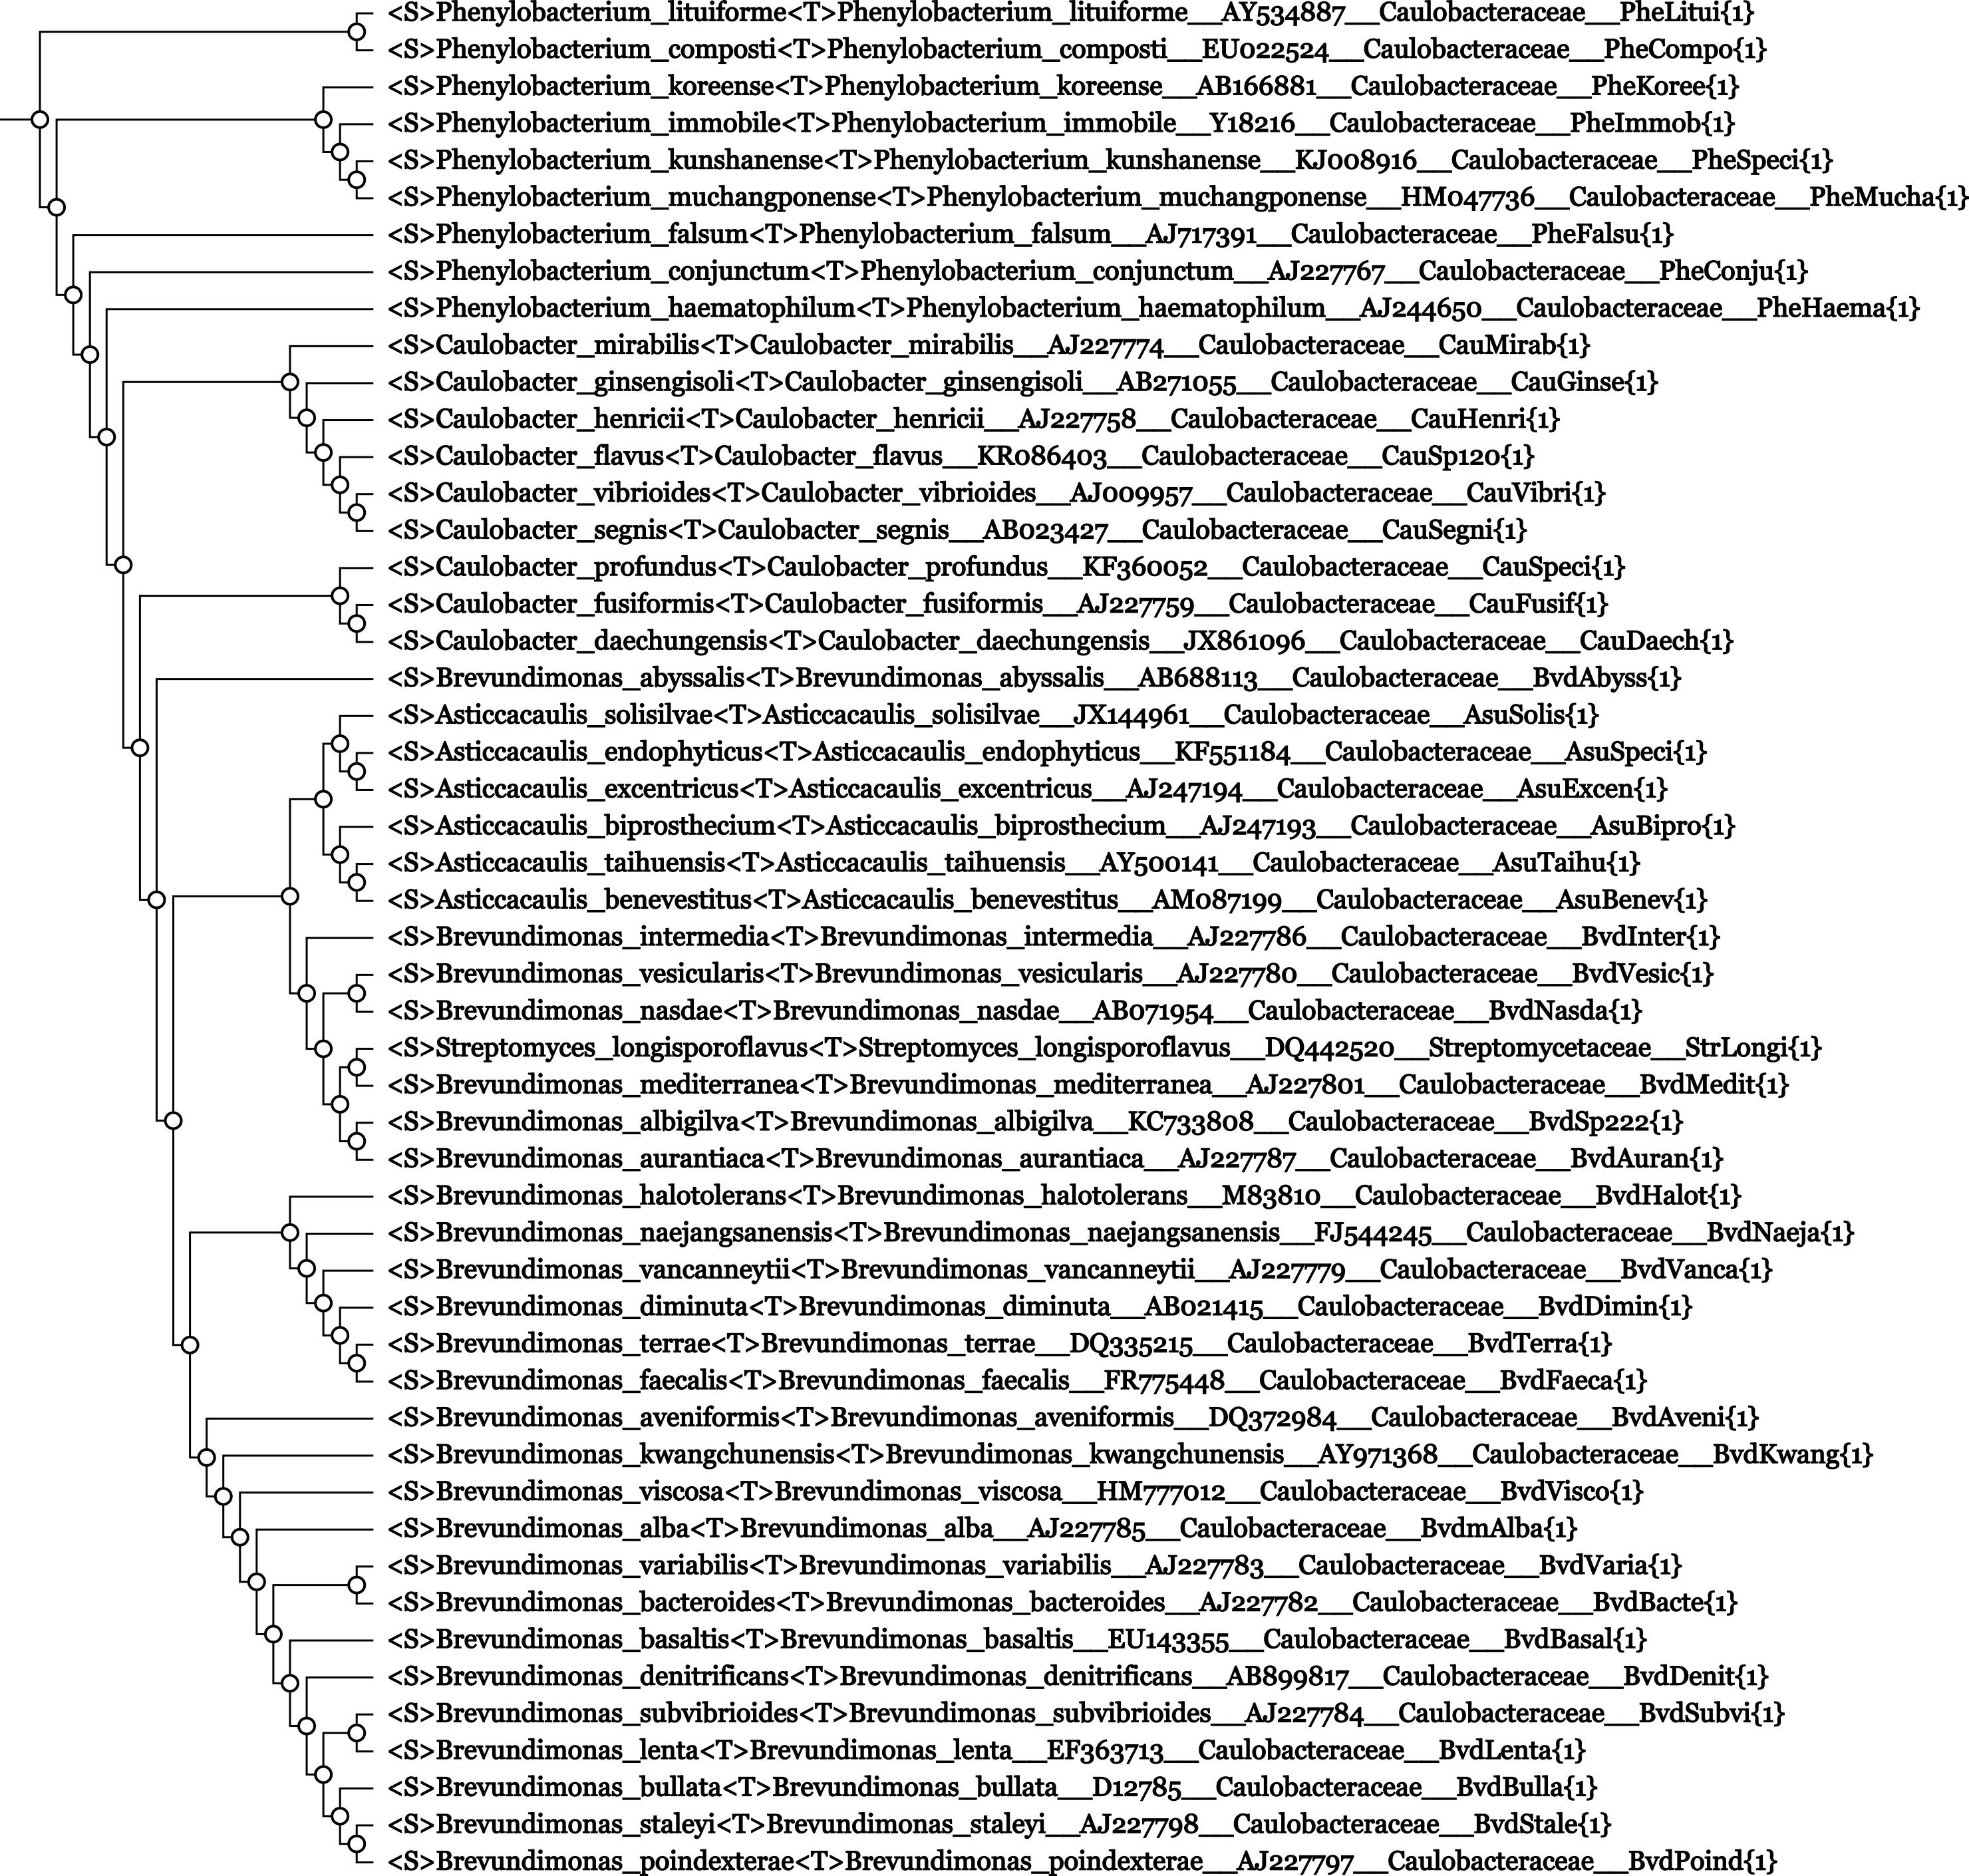

Supplement: mmc1.pdf [file mmc1.pdf]

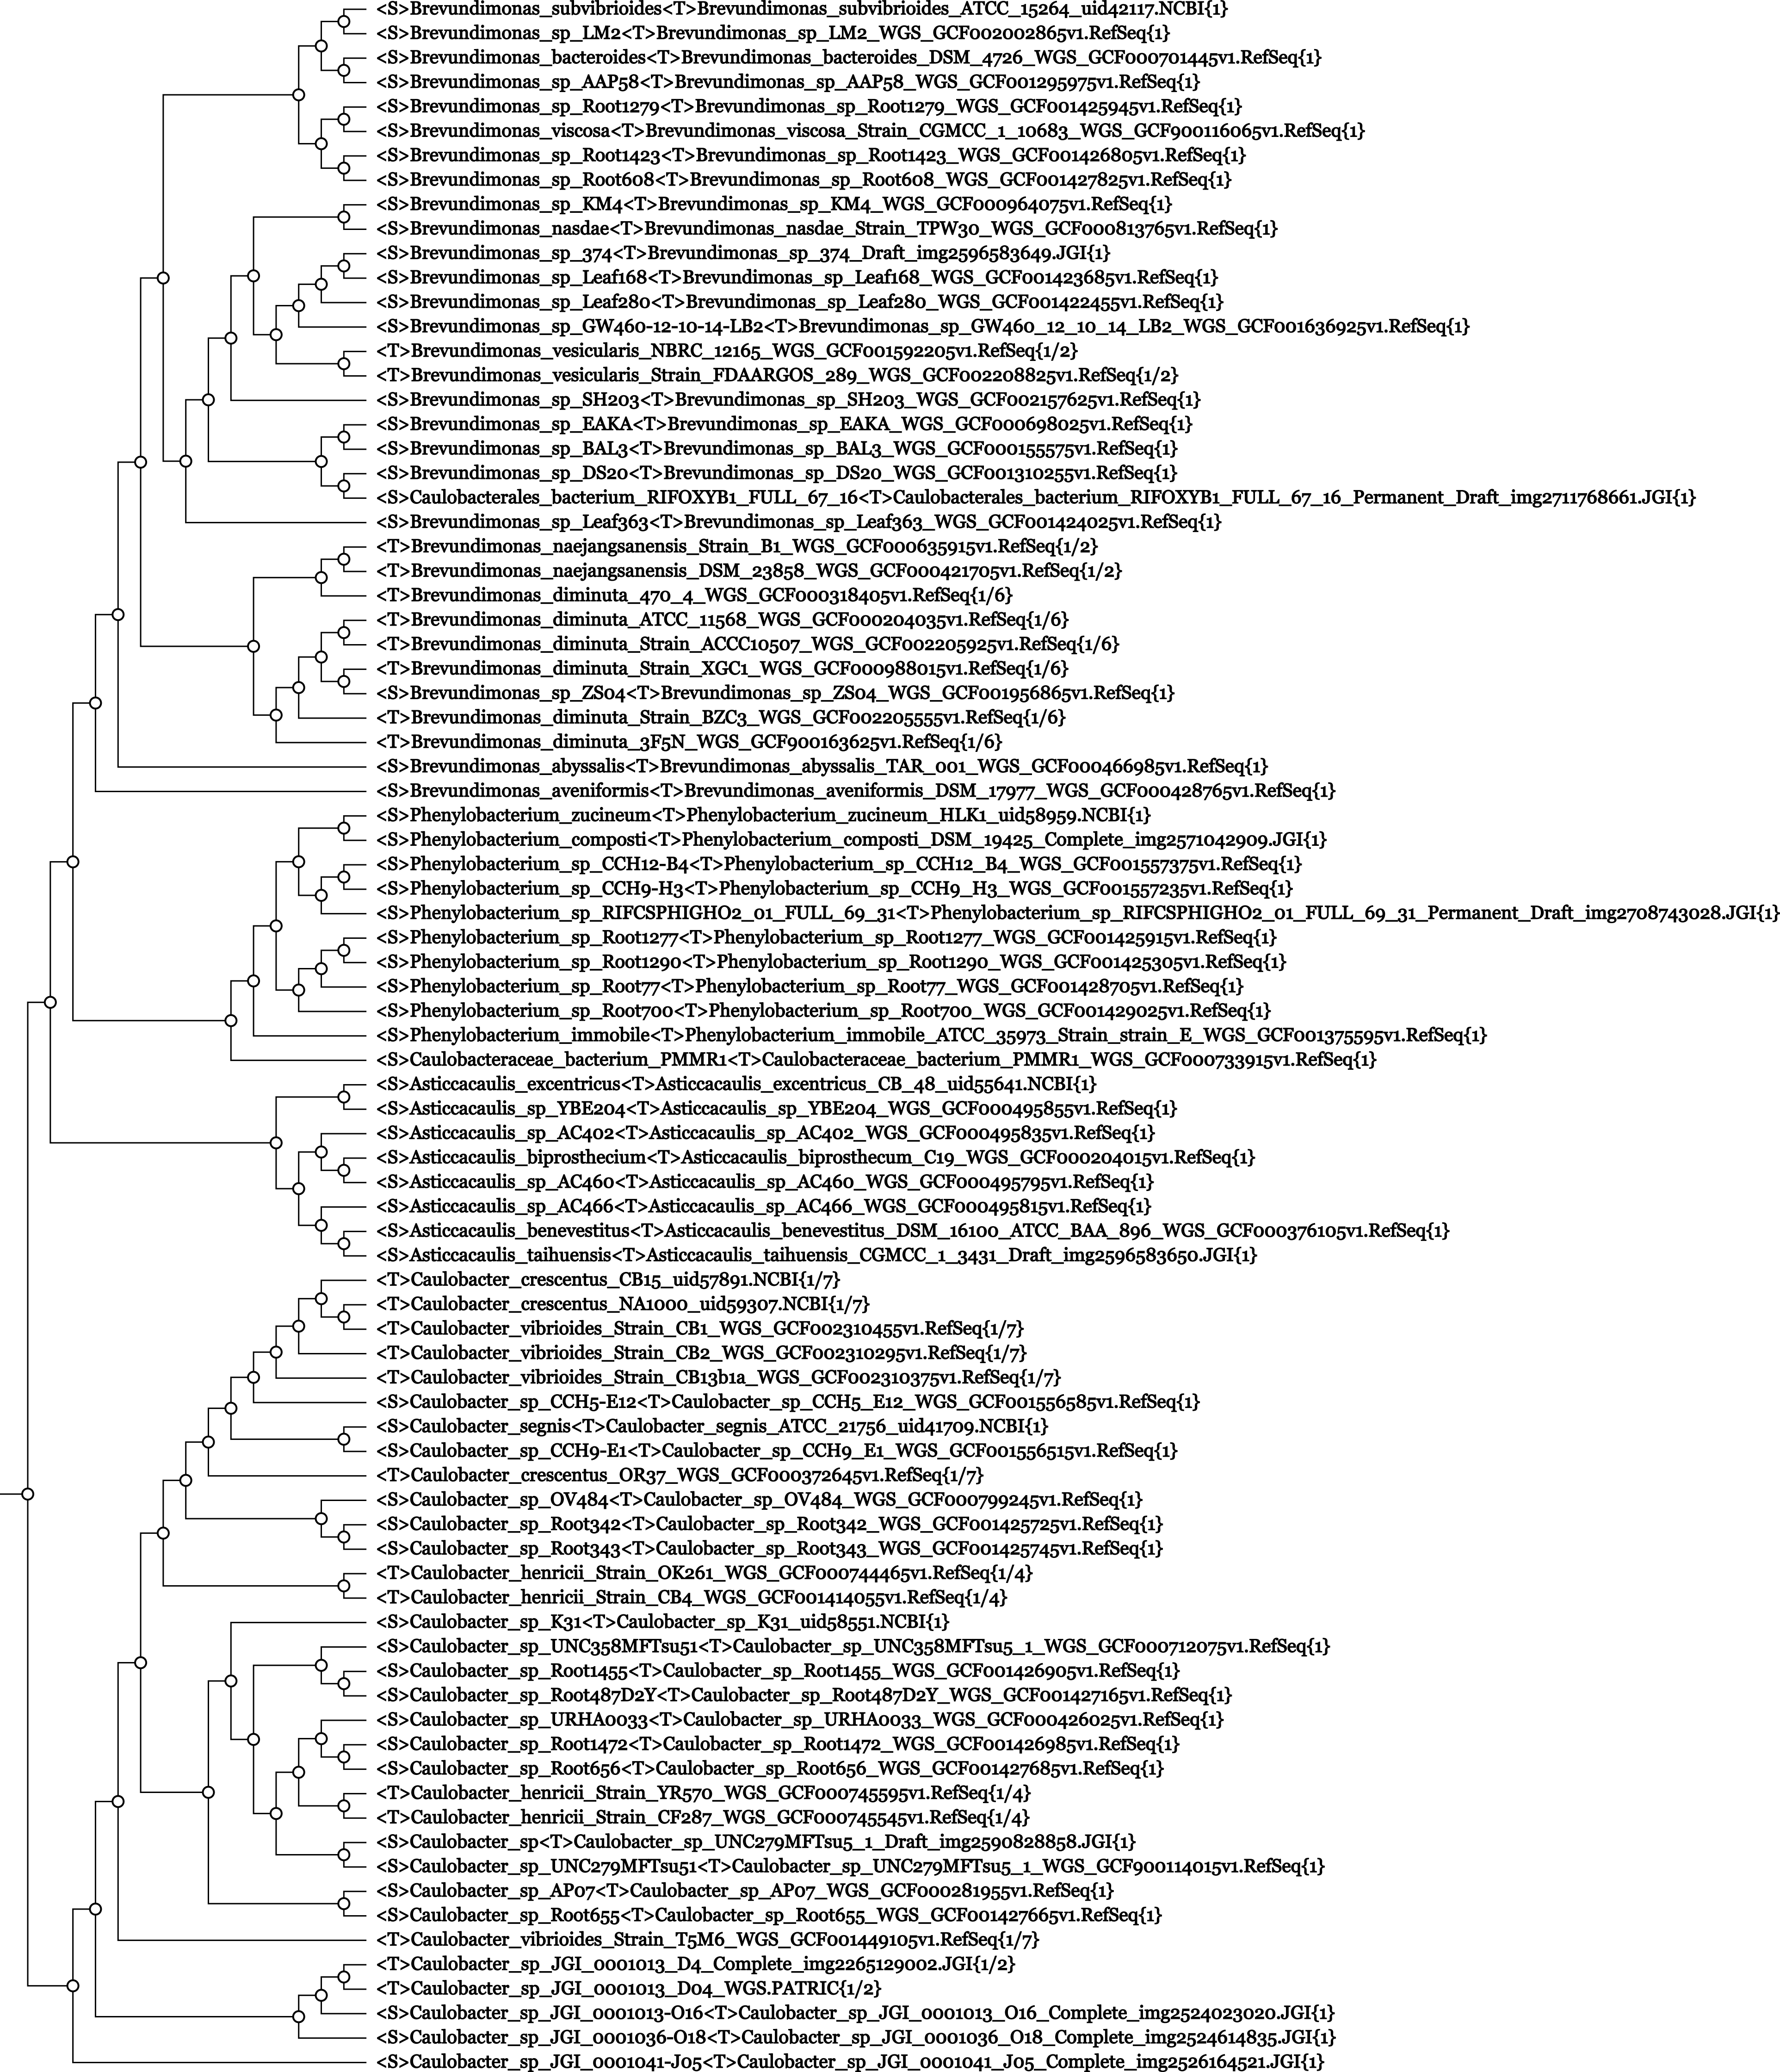

Supplement: mmc2.pdf [file mmc2.pdf]

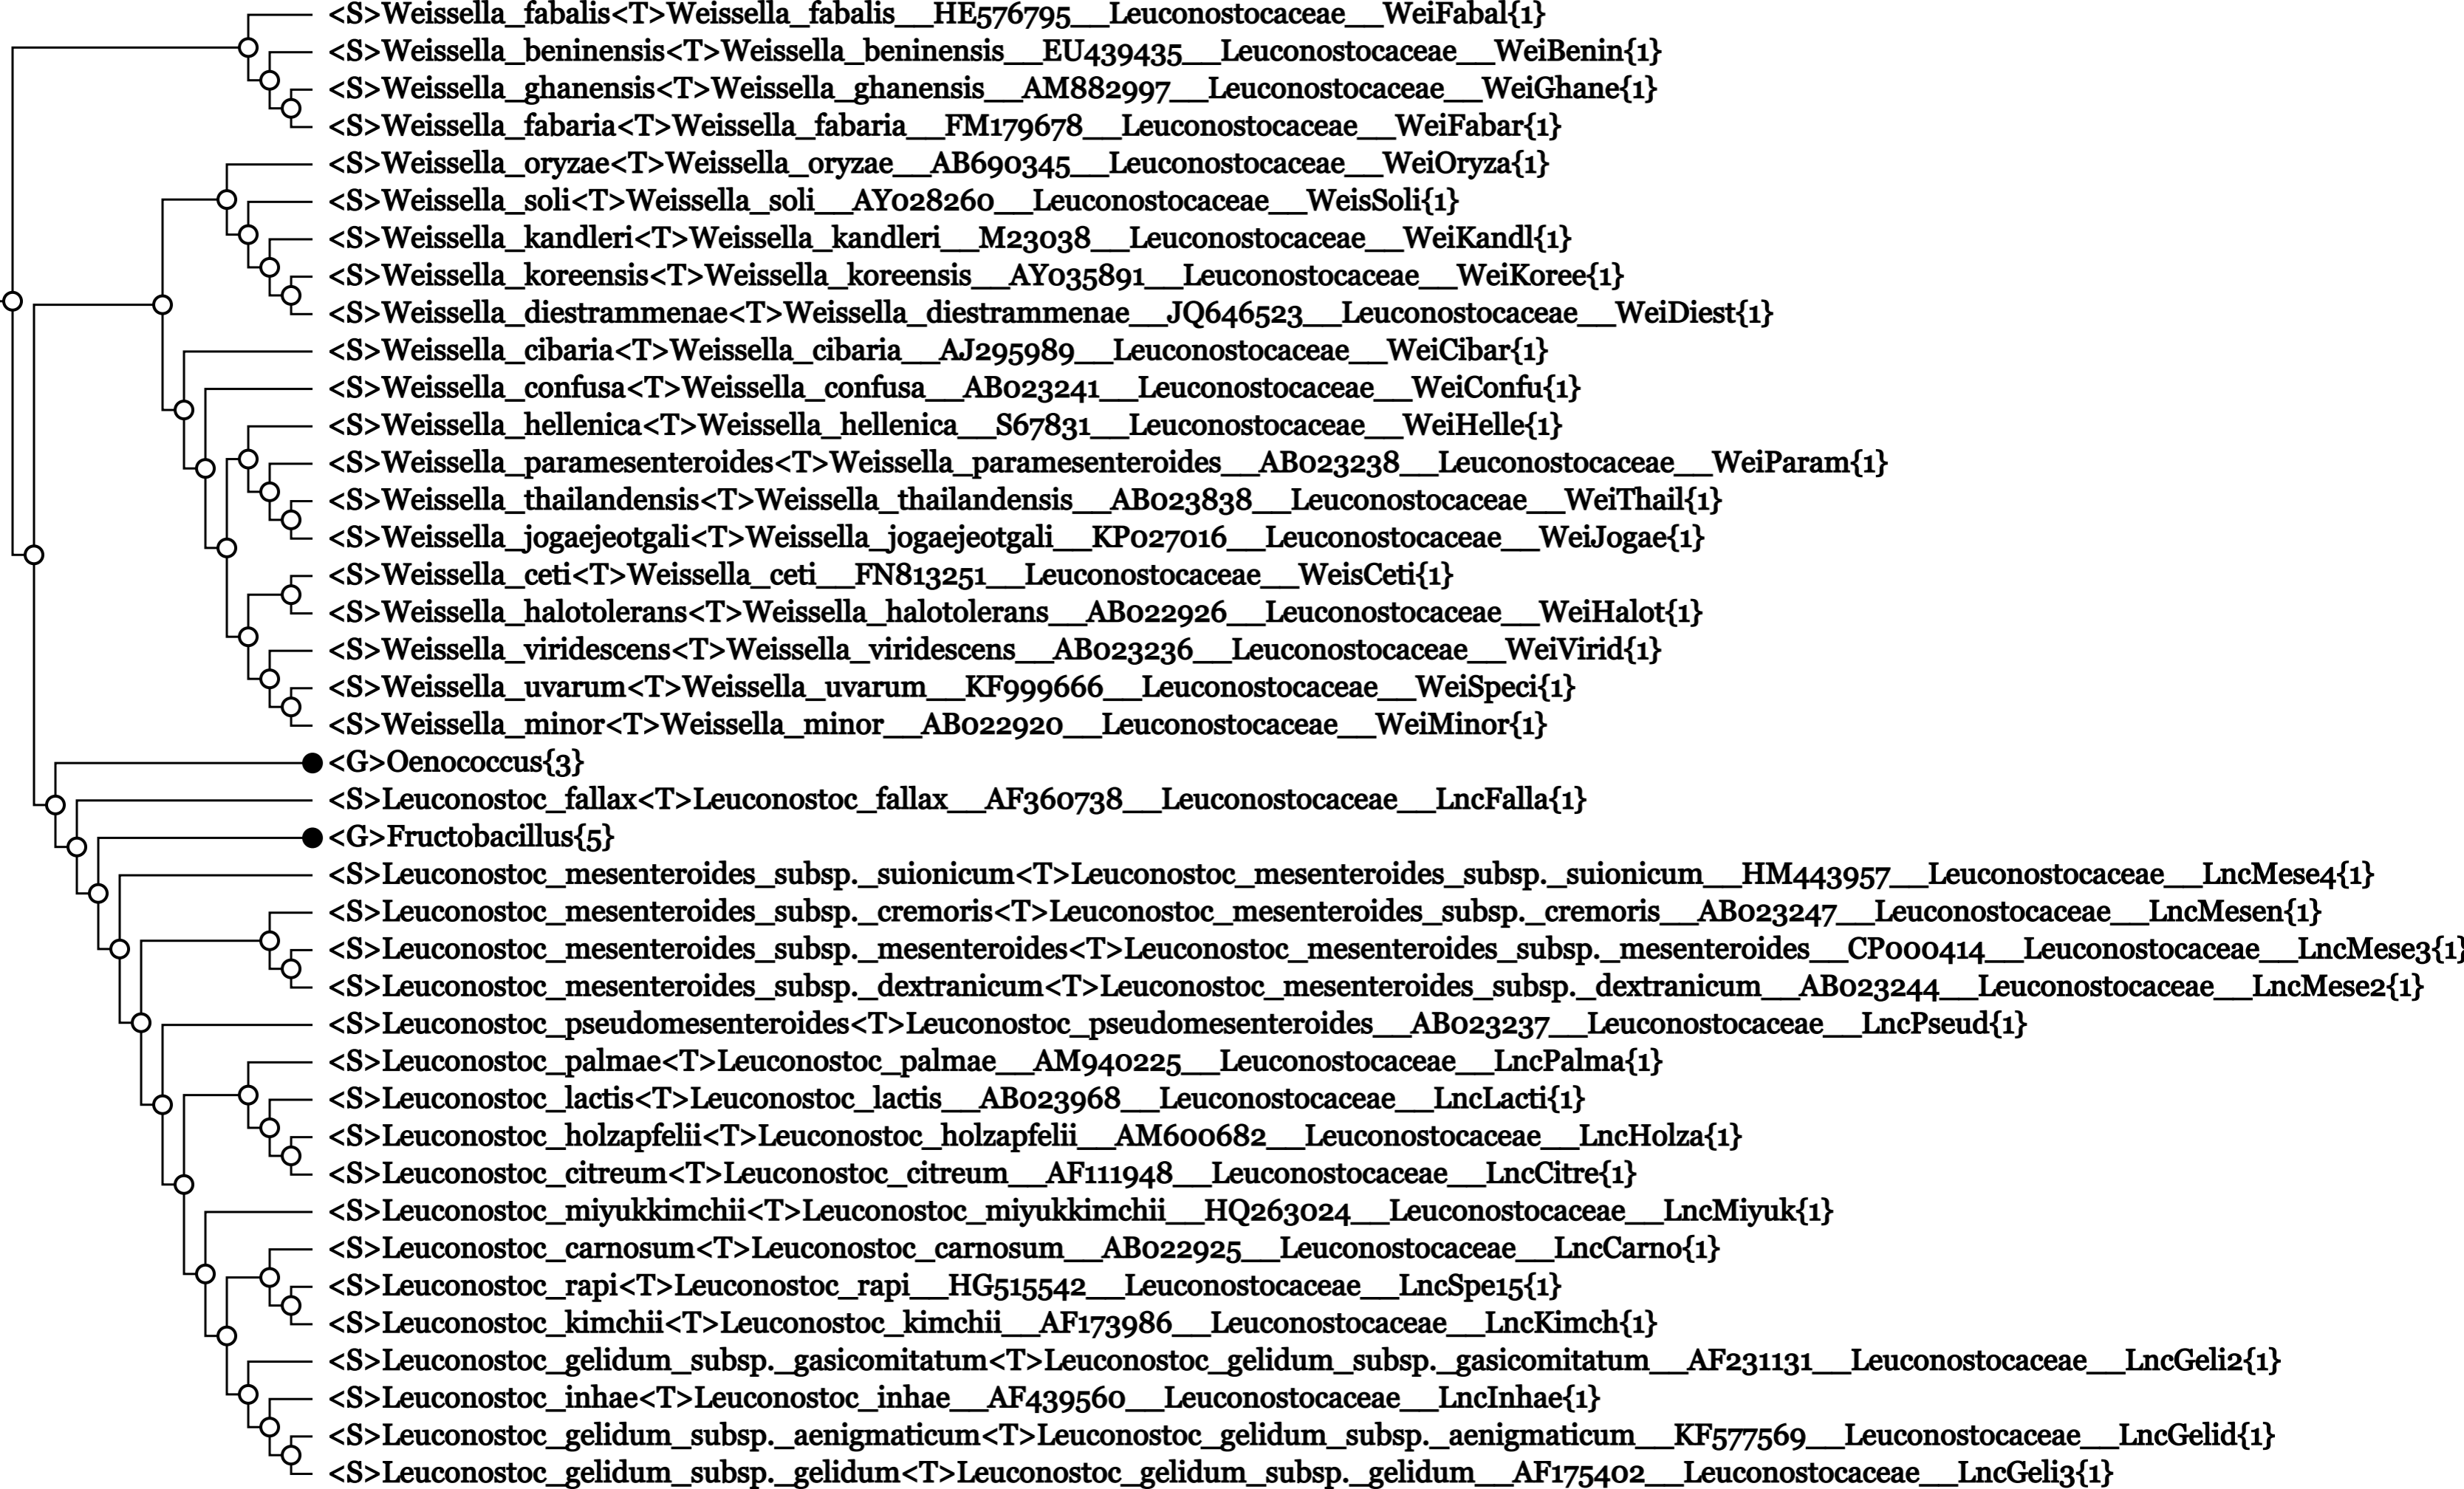

Supplement: mmc3.pdf [file mmc3.pdf]

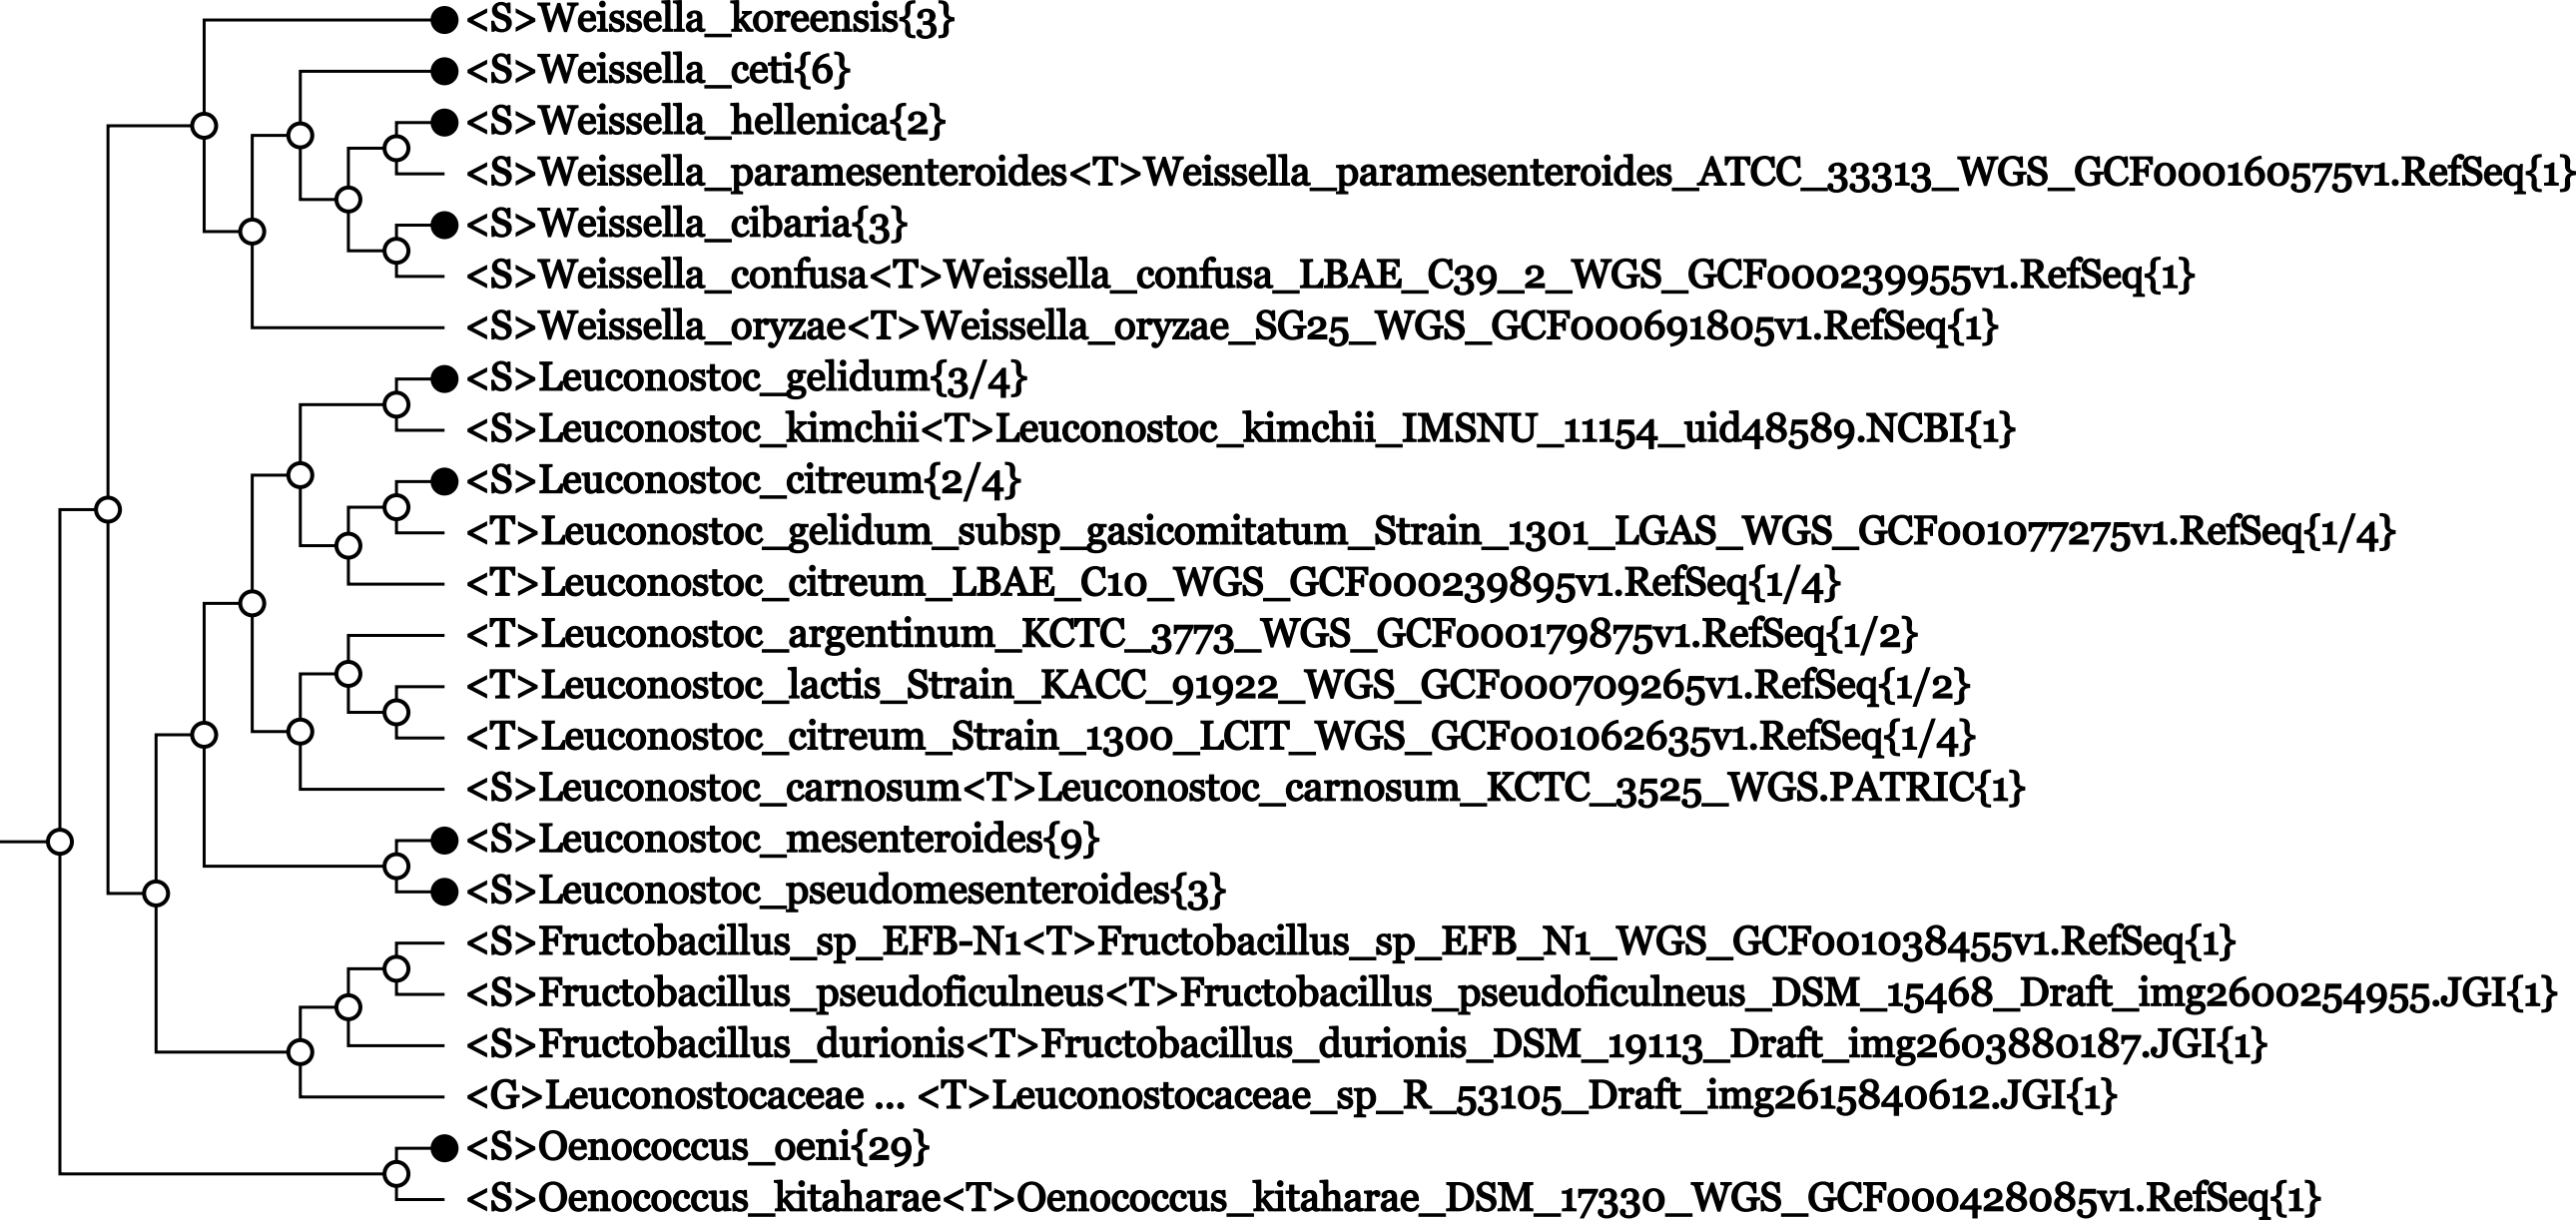

Supplement: mmc4.pdf [file mmc4.pdf]

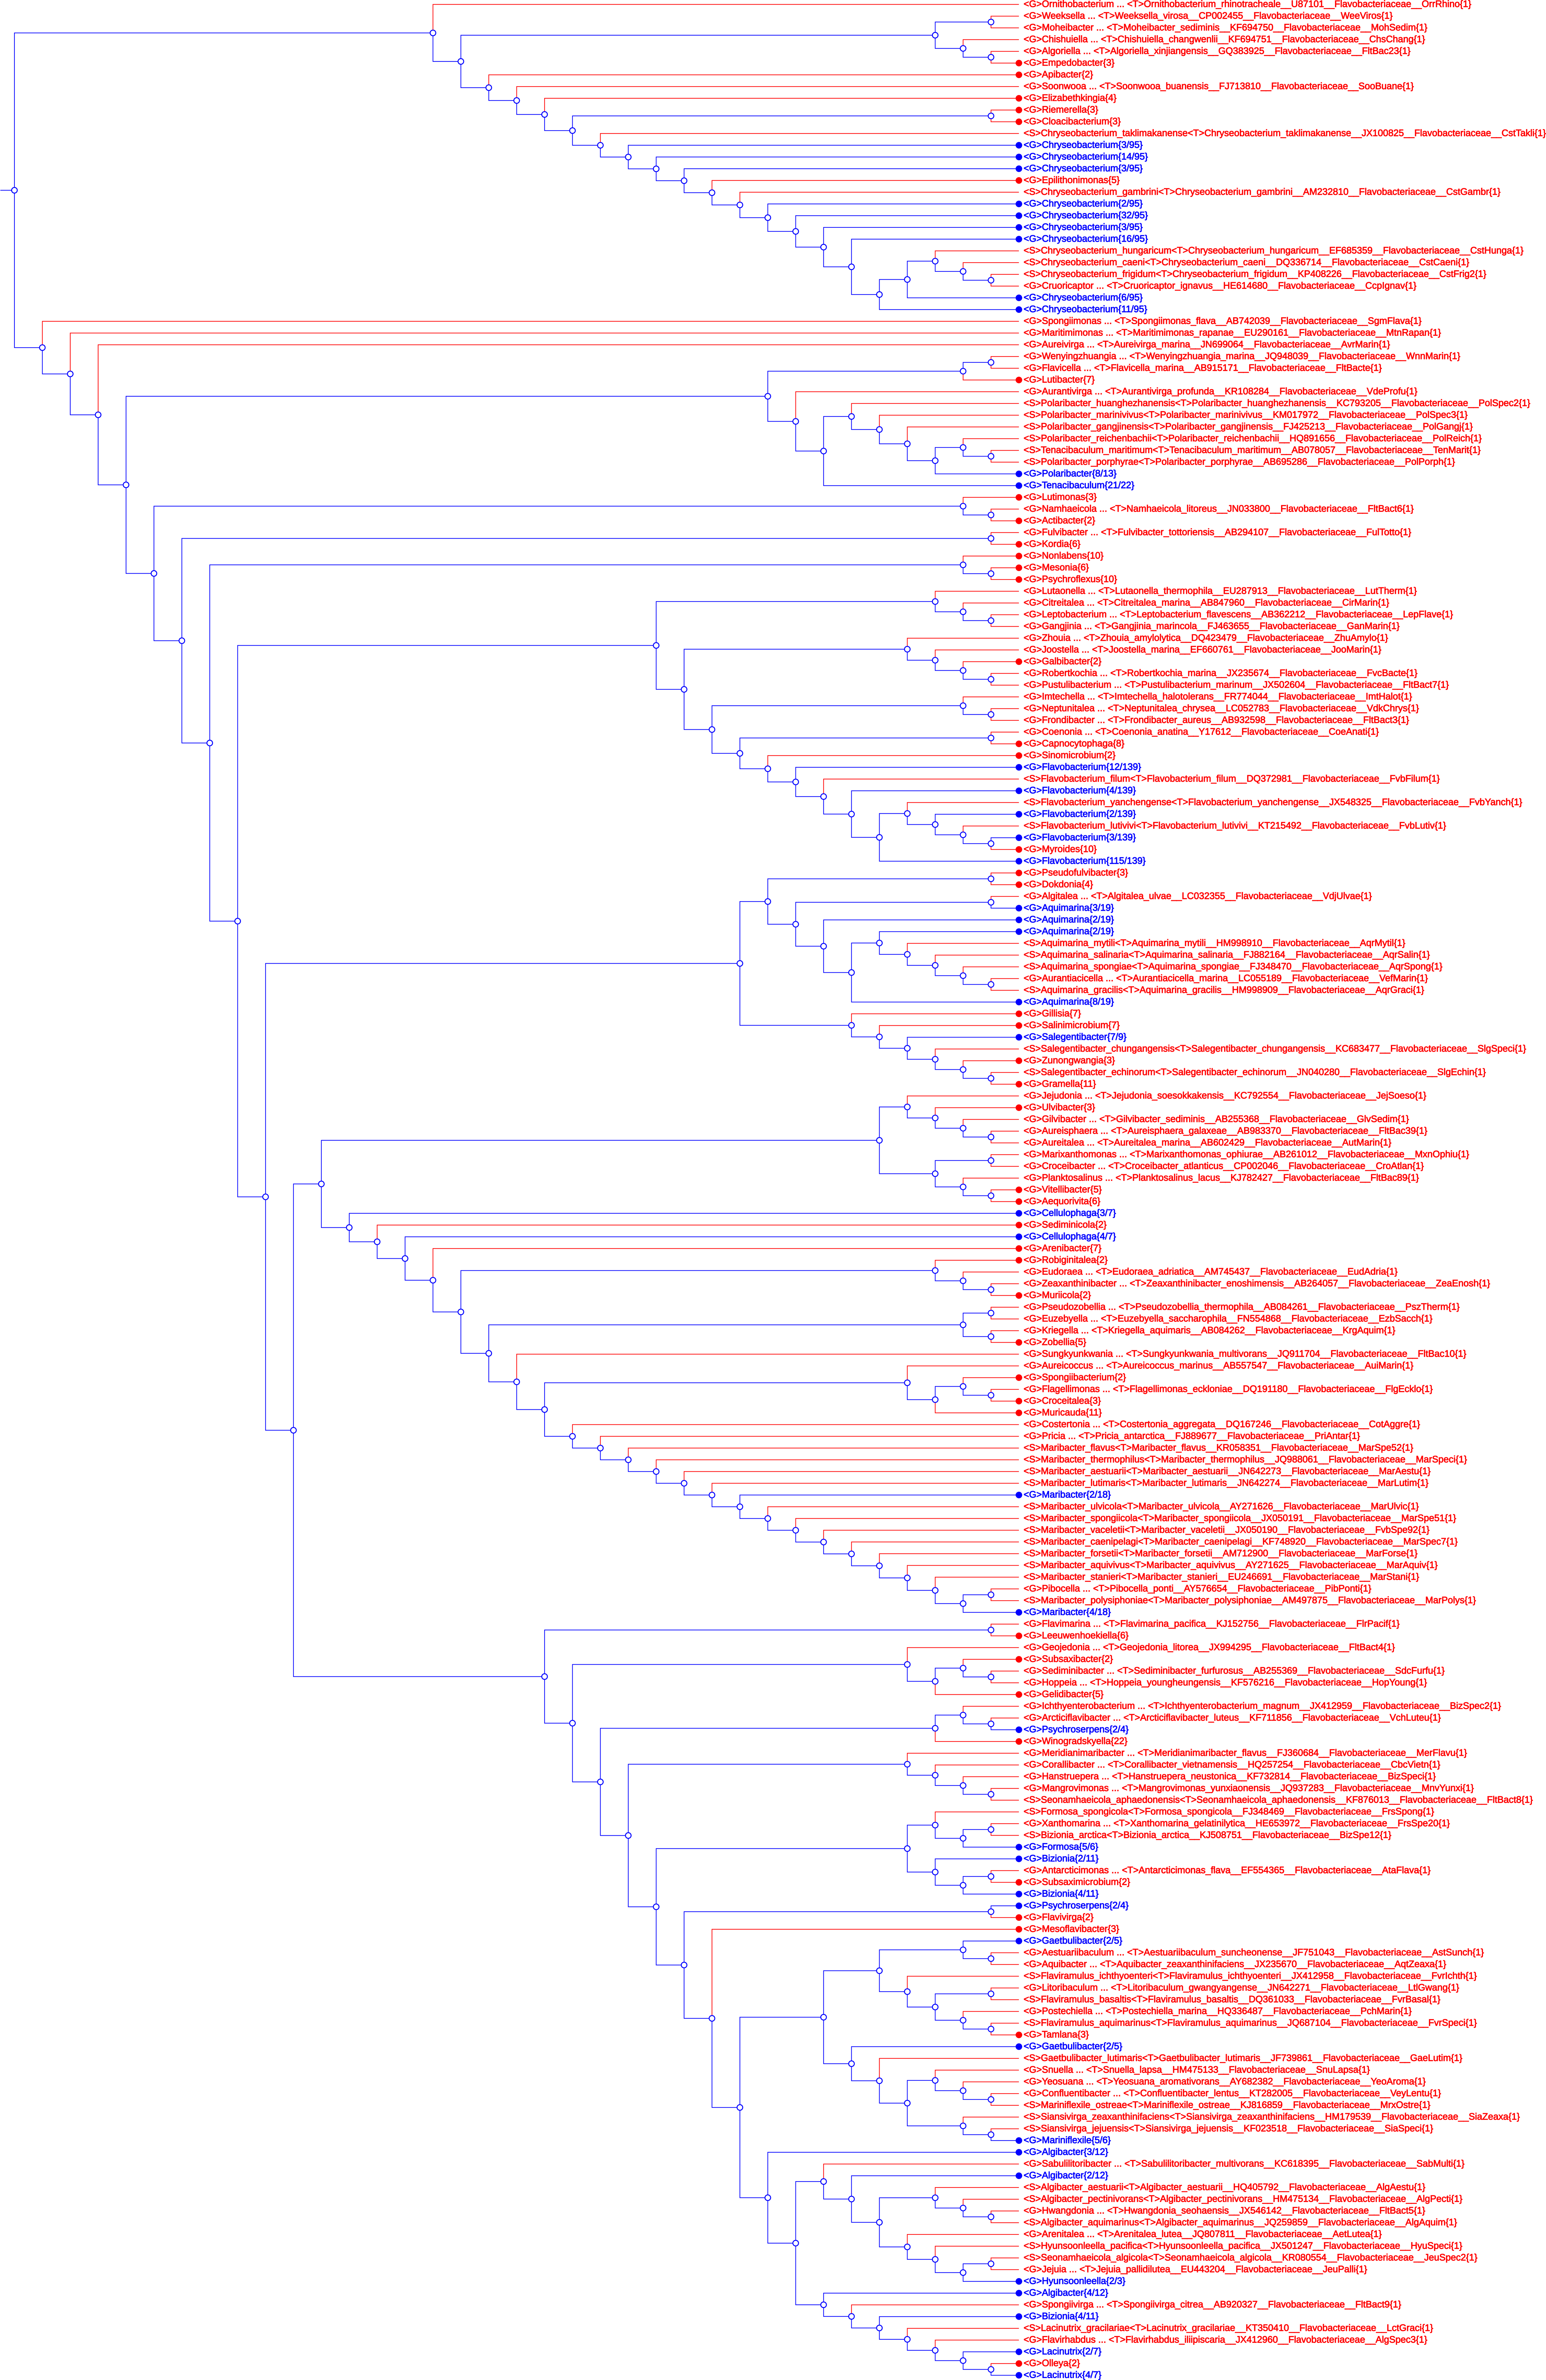

Supplement: mmc5.pdf [file mmc5.pdf]

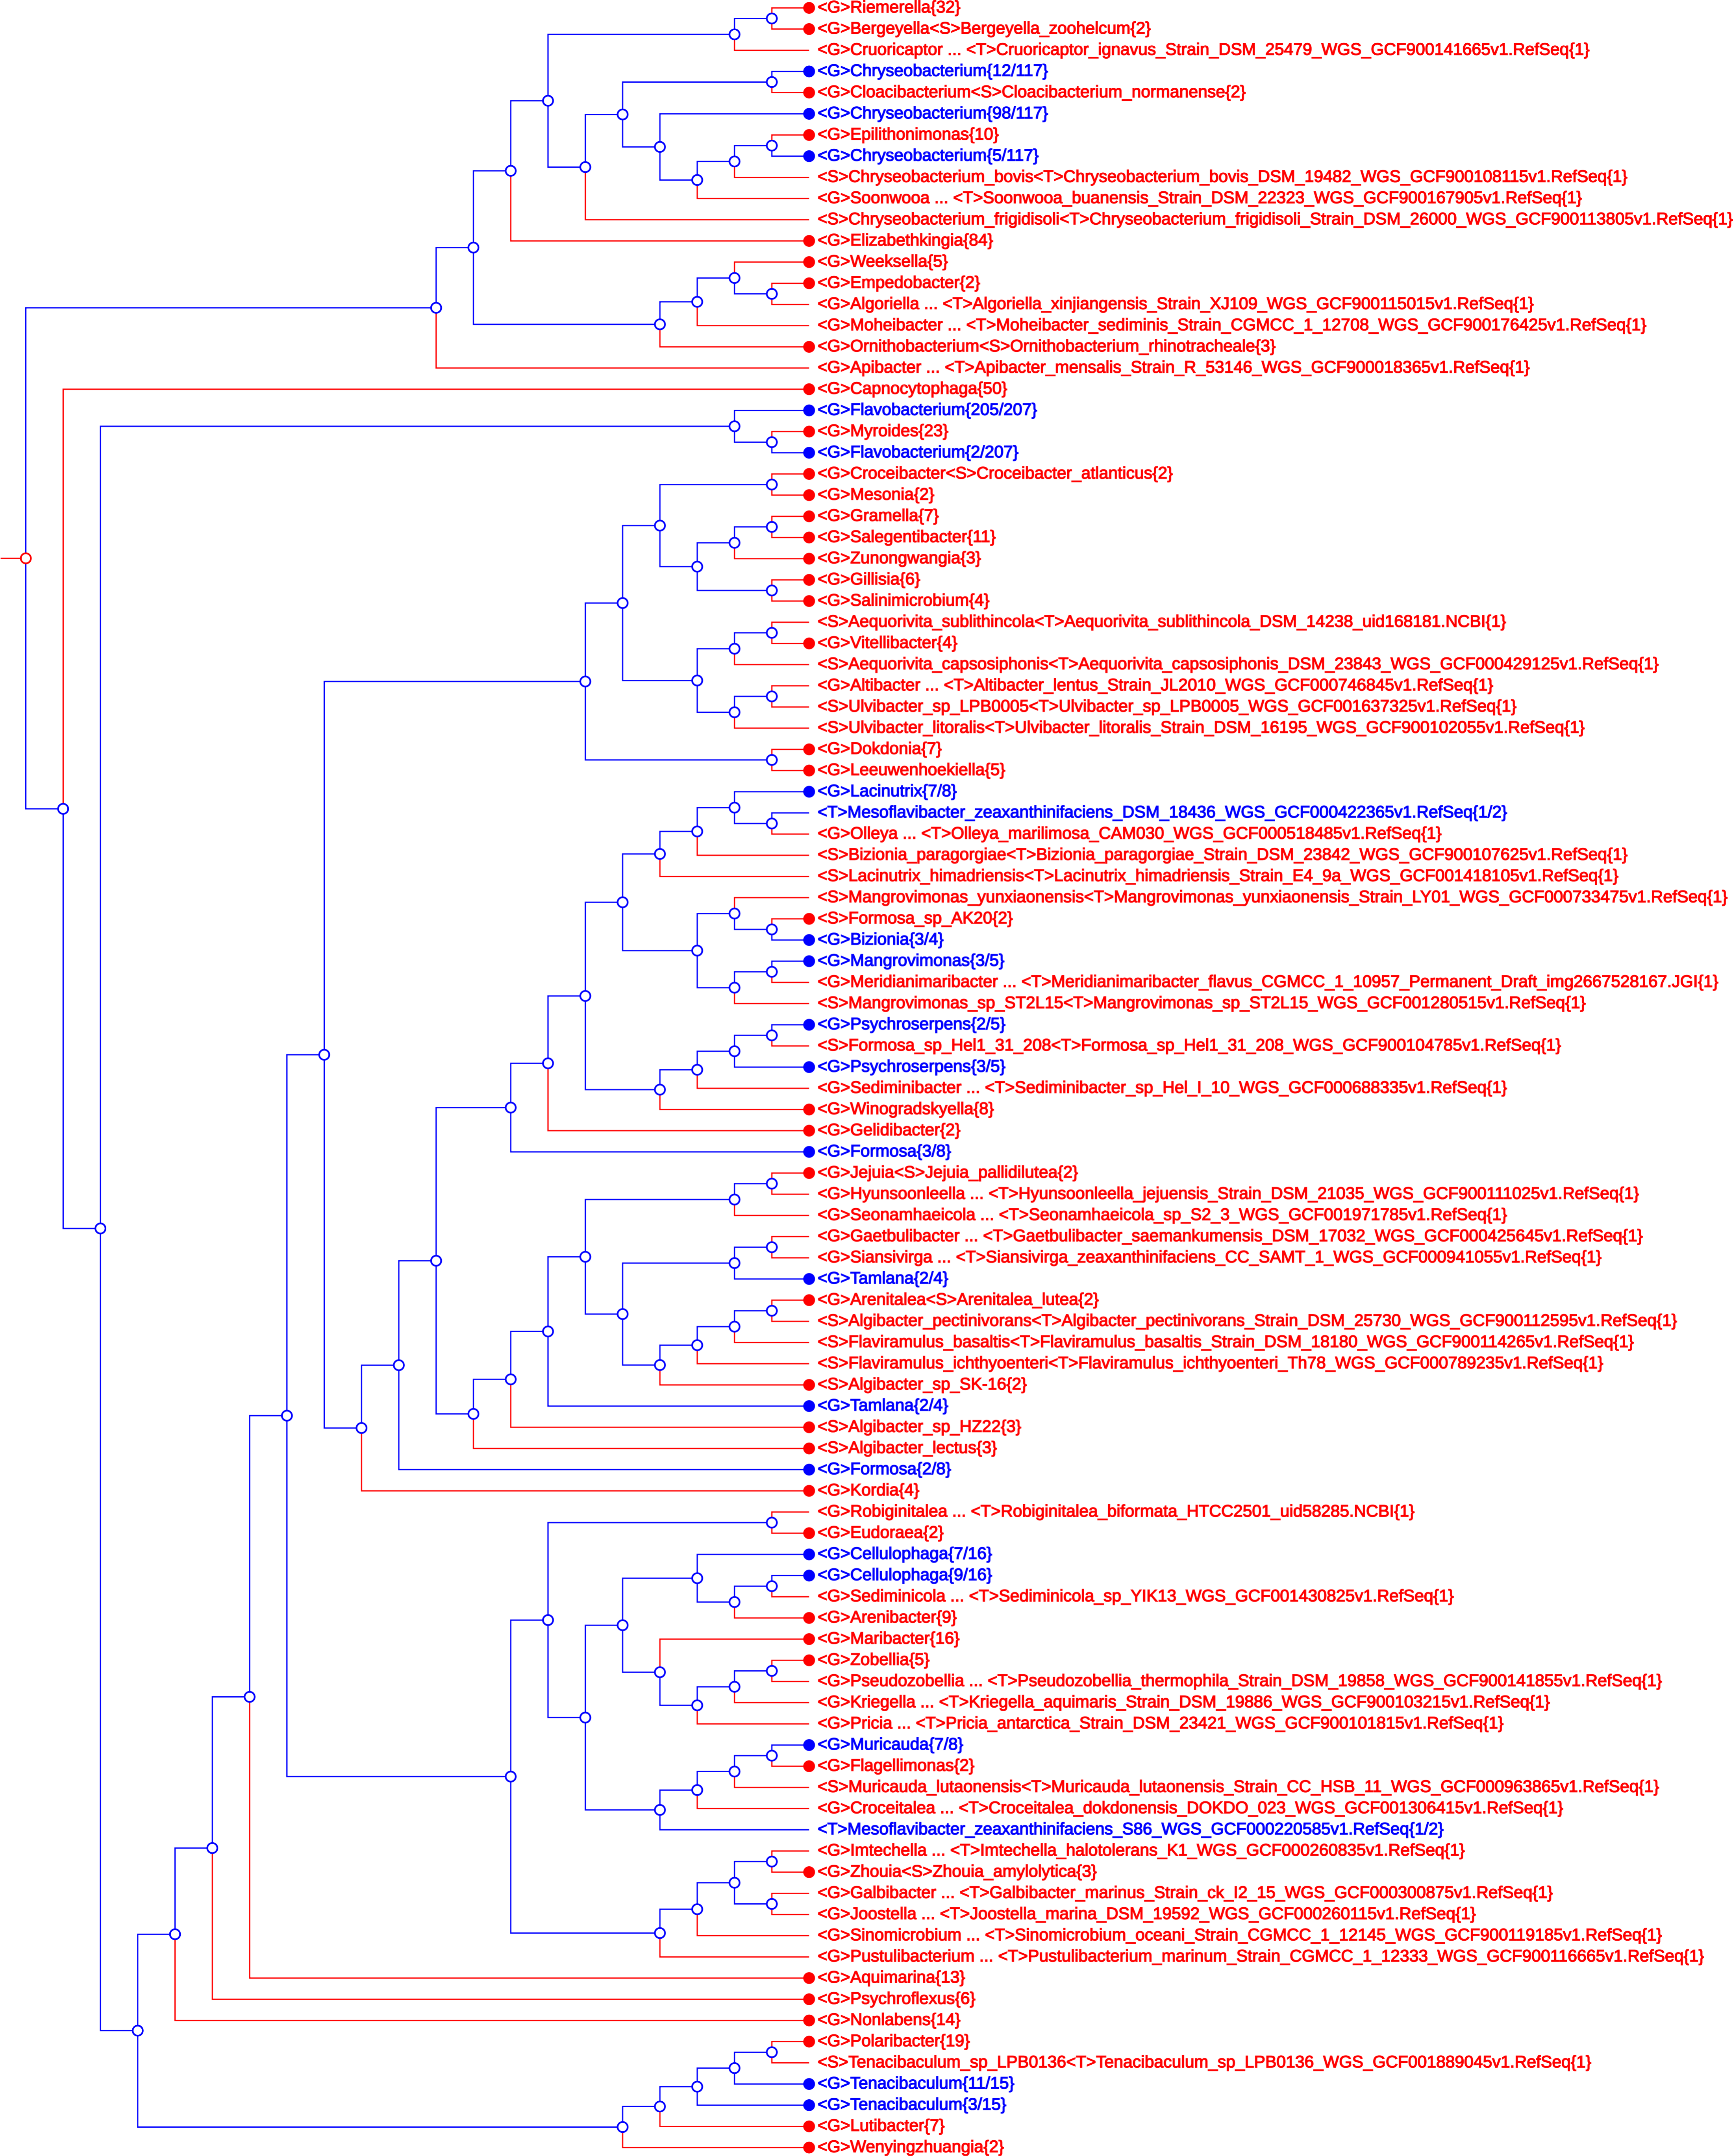

Supplement: mmc6.pdf [file mmc6.pdf]
